# Supplementary material for: Bioassay-Guided Assessment of Antioxidative, Anti-Inflammatory and Antimicrobial Activities of Extracts from Medicinal Plants via High-Performance Thin-Layer Chromatography
Source: MDPI journal article supplement (doi:10.3390/molecules28217346), 2023-10-30
Supplement: s1 [file s1]

## Supplementary material

### Bioassay-Guided Assessment of Antioxidative, Anti-Inflammatory and Antimicrobial Activities of Extracts from Medicinal Plants via High Performance Thin Layer Chromatography

Marko D. Jović<sup>1</sup>, Snezana Agatonovic-Kustrin<sup>2,3,\*</sup>, Petar M. Ristivojević<sup>4,\*</sup>, Jelena Đ. Trifković<sup>4</sup> and David W. Morton<sup>2,3</sup>

<sup>1</sup> Innovation Centre of the Faculty of Chemistry Ltd., University of Belgrade, Studentski Trg 12-16, 11158 Belgrade, Serbia

<sup>2</sup> Department of Pharmaceutical and Toxicological Chemistry named after Arzamastsev of the Institute of Pharmacy, I.M. Sechenov First Moscow State Medical University (Sechenov University), 119991 Moscow, Russia

<sup>3</sup> Department of Rural Clinical Sciences, La Trobe University, Edwards Road, Bendigo 3550, Australia

<sup>4</sup> Department of Analytical Chemistry, Centre of Excellence for Molecular Food Sciences, University of Belgrade, Studentski trg 12-16, 11158 Belgrade, Serbia

**Table S1.** Regression data for HPTLC assays.

| Method            | Standard       | Regression equation | R <sup>2</sup> | Linear range (µg) | LOD (µg) | LOQ (µg) |
|-------------------|----------------|---------------------|----------------|-------------------|----------|----------|
| COX-1             | Salicylic acid | y=53.269x + 33277   | 0.982          | 20-5000           | 519.0    | 1572.8   |
| <i>S. aureus</i>  | Streptomycin   | y=8722.3x + 80905   | 0.987          | 2.5-50            | 6.5      | 19.7     |
| <i>E. coli</i>    | Streptomycin   | y=10779x - 19261    | 0.989          | 2.5-45            | 5.2      | 15.9     |
| DPPH              | Gallic acid    | y=11388x + 45743    | 0.988          | 0.5-6             | 0.9      | 2.6      |
| FeCl <sub>3</sub> | Gallic acid    | y=11854x + 26440    | 0.975          | 1-10              | 1.8      | 5.3      |
| AlCl <sub>3</sub> | Rutin          | y=8407.9x + 38043   | 0.974          | 1-7               | 1.3      | 3.8      |

**Table S2.** Method precision in terms of relative standard deviations (RSD) for repeated measurements (*n*=3).

| TPC (Gallic acid) |         | Spectrophotometry |         |              |         | HPTLC                  |         |                                 |         |                               |         |                    |         |                                 |         |                           |         |
|-------------------|---------|-------------------|---------|--------------|---------|------------------------|---------|---------------------------------|---------|-------------------------------|---------|--------------------|---------|---------------------------------|---------|---------------------------|---------|
|                   |         | TFC (Rutin)       |         | RSA (Trolox) |         | COX-1 (Salicylic acid) |         | <i>S. aureus</i> (Streptomycin) |         | <i>E. coli</i> (Streptomycin) |         | DPPH (Gallic acid) |         | FeCl <sub>3</sub> (Gallic acid) |         | AlCl <sub>3</sub> (Rutin) |         |
| c (mg/mL)         | RSD (%) | c (mg/mL)         | RSD (%) | c (mg/mL)    | RSD (%) | Applied (µg)           | RSD (%) | Applied (µg)                    | RSD (%) | Applied (µg)                  | RSD (%) | Applied (µg)       | RSD (%) | Applied (µg)                    | RSD (%) | Applied (µg)              | RSD (%) |
| 15.0              | 2.85    | 20.0              | 9.16    | 100.0        | 10.68   | 400.0                  | 10.10   | 5.0                             | 13.86   | 5.0                           | 15.70   | 0.5                | 3.63    | 1.0                             | 4.44    | 1.0                       | 4.77    |
| 60.0              | 1.77    | 50.0              | 6.71    | 300.0        | 6.64    | 1000.0                 | 6.69    | 25.0                            | 11.54   | 25.0                          | 10.24   | 3.0                | 4.47    | 5.0                             | 1.23    | 6.0                       | 3.03    |
| 125.0             | 1.41    | 100.0             | 4.71    | 500.0        | 6.65    | 2000.0                 | 3.88    | 50.0                            | 10.52   | 45.0                          | 11.56   | 5.0                | 2.38    | 7.0                             | 1.06    | 7.0                       | 2.07    |
| Average           | 2.01    |                   | 6.86    |              | 7.99    |                        | 6.89    |                                 | 11.97   |                               | 12.50   |                    | 3.49    |                                 | 2.24    |                           | 3.29    |

**Table S3.** Regression data for colorimetric assays.

| Method | Standard    | Regression equation  | R <sup>2</sup> | Linear range (mg/L) | LOD (mg/L) | LOQ (mg/L) |
|--------|-------------|----------------------|----------------|---------------------|------------|------------|
| TPC    | Gallic acid | y=0.0085x + 0.0408   | 0.998          | 10-250              | 14.2       | 43.1       |
| TFC    | Rutin       | y=0.00065x + 0.00327 | 0.985          | 10-100              | 12.1       | 36.8       |
| RSA    | Trolox      | y=267.3x-0,5509      | 0.993          | 0.025-0.15          | 0.015      | 0.045      |
